**TITLE:** HEPATIC O<sub>2</sub> REGULATION DURING  
ENDOTOXEMIA

**AUTHORS:** R. Schlichtig, M.D., H.A. Klions, M.D.

**AFFILIATION:** Dept. Anesthesiology and Critical Care  
Medicine, University of Pittsburgh,  
Pittsburgh, PA 15261

Most tissues display O<sub>2</sub> regulatory behavior such that O<sub>2</sub> consumption (VO<sub>2</sub>) is independent of O<sub>2</sub> delivery (DO<sub>2</sub>) until a critical value of DO<sub>2</sub> (DO<sub>2c</sub>) is reached. Below DO<sub>2c</sub>, VO<sub>2</sub> becomes O<sub>2</sub> supply dependent. However it is not clear whether O<sub>2</sub> supply dependency represents exhaustion of O<sub>2</sub> regulatory mechanisms, or simply O<sub>2</sub> conformity (i.e. arrest of non-essential metabolism) in individual organs. We measured liver DO<sub>2</sub> and VO<sub>2</sub> using hepatic arterial and portal venous electromagnetic flow probes and O<sub>2</sub> content differences, and estimated liver NADH/NAD as hepatic venous B-hydroxybutyrate to acetoacetate ratio (BAR) (1) in seven pentobarbital-anesthetized mongrel dogs following bolus infusion of E. coli lipopolysaccharide, 5 mg/kg. We assessed hepatic O<sub>2</sub> regulation by progressive hemorrhage in 50 to 100 ml increments, and estimated liver DO<sub>2c</sub> by applying dual line regression (2) to pooled data (figure 1). BAR was relatively constant during O<sub>2</sub> supply independency but rose progressively during O<sub>2</sub> supply dependency (figure 2). These data are in agreement with observations in control animals (3). We conclude that liver O<sub>2</sub> supply dependency in endotoxin-treated dogs, as well as in control dogs, represents exhaustion of O<sub>2</sub> regulatory mechanisms, rather than O<sub>2</sub> conformity.

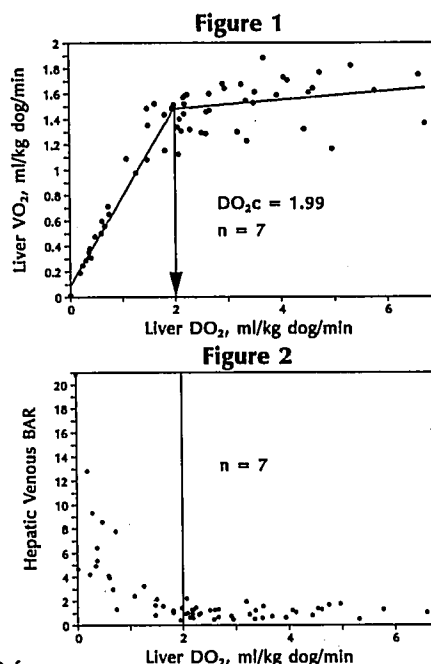

- References**
1. Biochem. J. 103; 514-527, 1967
  2. J. Appl. Physiol. 64: 2074-2082; 1988
  3. Am. Rev. Respir. Dis. (abstract); 1990 (in press)

## A1189

**TITLE:** EFFECTS OF FLUID BALANCE AND  
PROSTAGLANDIN E<sub>1</sub> (PGE<sub>1</sub>) ON  
REIMPLANTATION PULMONARY EDEMA  
(RPE) IN HEART-LUNG TRANSPLANT  
RECIPIENTS (HLTR)

**AUTHORS:** M Norgaard, M.D., BP McGlinch, B.S.,  
ND Dikel, M.D., JA Estrin, M.D., Ph.D.

**AFFILIATION:** Anes. Dept., University of Minnesota  
Minneapolis, Minnesota 55455

To determine the effects of perioperative fluid management on the RPE<sup>1</sup> of HLTR, we examined fluid balance [percent change from pre-operative body weight, (%Δ BW)], gas exchange, [pH<sub>a</sub>, PaO<sub>2</sub> (mmHg), PaCO<sub>2</sub> (mmHg), HCO<sub>3</sub><sup>-</sup> (mEq/L), A-aDO<sub>2</sub> (mmHg)], urine output [(UO), (ml/kg/hr)], hemodynamics [CI (l/min/m<sup>2</sup>), PVRI (dyne-sec/cm<sup>5</sup>·m<sup>2</sup>), CVP (mmHg), PAD (mmHg)] and chest x-rays at 24 hours post-implantation (24-HPI) in two groups of HLTR. Two HLTR with graft dysfunction (A-aDO<sub>2</sub> ≥ 390 at 24 hrs) due to pulmonary contusion or protamine-induced pulmonary edema were not included. Group I [n = 6, male/female ratio (M/F) = 2, 34 ± 1 yrs (mean ± SEM), 67 ± 6 kg, primary pulmonary hypertension (PPH) 66%, Eisenmenger complex (EMC) 17%, other 17%] received grafts from locally procured donors [graft ischemia time (GIT) = 99 ± 10 min], while group II (n = 10, M/F = 2, 30 ± 3 yrs, 53 ± 8 kg, PPH 40%, EMC 30%, other 30%) received grafts from distantly procured donors (GIT = 204 ± 14 min) during hypothermic cardiopulmonary bypass [(CPB), (28°C, Hct 25%)]. Donors had PaO<sub>2</sub> ≥ 100 mmHg at FiO<sub>2</sub> ≤ .4 with PIP ≤ 30 cmH<sub>2</sub>O at V<sub>T</sub> 10-12 ml/kg and were preserved at 4°C with Collins solution. Whereas 80% of group II was treated with PGE<sub>1</sub> (.05 ± .01 μg/kg/min) post-CPB, only 17% of group I received PGE<sub>1</sub> (p =

.01, chi-squared). Diuresis was forced in group II but not group I. At 24-HPI, 16 HLTR, 5 extubated (FiO<sub>2</sub> = .35 ± .04) and 11 intubated (FiO<sub>2</sub> = .39 ± .04, IMV 8 ± 2 bpm, V<sub>T</sub> 769 ± 42 ml, PEEP 5 ± 1 cmH<sub>2</sub>O) from groups I and II had hemodynamics, gas exchange, UO and %Δ BW as shown (Table). RPE was present in all but one HLTR; the radiologic severity of RPE was not different between groups. The A-aDO<sub>2</sub> in group II (58 ± 11 mmHg) was significantly lower than in group I (220 ± 52 mmHg) at 24-HPI (p = .0009, unpaired Student's t-test) despite a longer GIT (p = .0001) and higher PAD (p = .01). While UO at 24-HPI, higher in group II (p = .0001), was a good predictor of A-aDO<sub>2</sub> [(r = -.65, y = 336.5 - 45.8x, p = .009) (Fig.)]; GIT, CPB time and %Δ BW were not. These data demonstrate that RPE, a frequent finding in HLTR 24-HPI, and the concomitant abnormalities of gas exchange may be favorably influenced by a forced diuresis and PGE<sub>1</sub> therapy during and up to 24-HPI in spite of a longer GIT.

- References**
1. Progress in Cardiology, Vol. 16, Chapter 3, pp. 51-80, 1988.

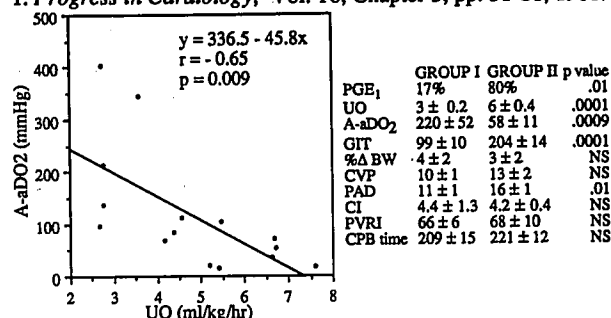

Source: https://asa2.silverchair.com/anesthesiology/article-pdf/73/3A/NA/667441/0000542-199009001-01189.pdf
